# Supplementary material
Source: HighWire-hosted journal article supplement (https://www.cmajopen.ca/highwire/filestream/87147/field_highwire_adjunct_files/2/open-2021-0024-original-submission.pdf)
Supplement: open-2021-0024-original-submission.pdf [file open-2021-0024-original-submission.pdf]

## Estimating Population Health Burden of Lyme disease in Ontario, Canada: A Microsimulation Modeling Approach

Stephen Mac<sup>1,2</sup>, Gerald A. Evans<sup>3,4</sup>, Samir N. Patel<sup>5,6</sup>, Eleanor M. Pullenayegum<sup>7,8</sup>, Beate Sander<sup>1,2,4,5</sup>

<sup>1</sup> Institute of Health Policy, Management and Evaluation, University of Toronto, Toronto, Canada

<sup>2</sup> THETA Collaborative, University Health Network, Toronto, Canada

<sup>3</sup> Department of Medicine, Queen's University, Kingston, Canada

<sup>4</sup> ICES, Toronto, Canada

<sup>5</sup> Public Health Ontario, Toronto, Canada

<sup>6</sup> Department of Laboratory Medicine and Pathobiology, University of Toronto, Toronto, Canada

<sup>7</sup> The Hospital for Sick Children (SickKids), Toronto, Canada

<sup>8</sup> Dalla Lana School of Public Health, University of Toronto, Toronto, Canada

**Corresponding author:** Stephen Mac, Institute of Health Policy, Management and Evaluation, University of Toronto, 155 College Street, 4th floor, Toronto, ON M5T3M6, Canada. E: 416-634-8020, e: sm.mac@mail.utoronto.ca

**Funding Statement:** This work was supported by the Canadian Institutes of Health Research (CIHR) project grant PJT149087 held by BS. SM is supported by a CIHR Frederick Banting and Charles Best Canada Graduate Scholarship Doctoral Award GSD-159274. BS is supported by a Canada Research Chair in Economics of Infectious Diseases (CRC-950-232429). The funders had no role in study design, data collection and analysis, decision to publish, or preparation of the manuscript.

**Competing interests:** All authors have no potential conflicts of interest to declare.

**Keywords:** Lyme disease; *Borrelia burgdorferi*; Illness burden; decision modeling; quality-adjusted life years

## ABSTRACT

**Background:** Lyme disease (LD), untreated, can lead to long-term sequelae and post-treatment Lyme disease syndrome (PTLDS), resulting in reduced health-related quality-of-life. The objective of this study was to develop a microsimulation model to estimate the population-level health burden of LD in Ontario, Canada.

**Methods:** We developed a LD disease history model using microsimulation, simulating 100,000 individuals (mean age 37.6 years, 51% female) in Ontario over a lifetime risk of infection and time horizon. Sensitivity and specificity for CDC-recommended two-tier testing, probabilities, and health state utility values were extracted from the published literature and health administrative data. Our outcomes include diagnosed LD cases (stratified by stage), undiagnosed infections, sequelae, individuals experiencing PTLDS, and quality-adjusted life years (QALYs) lost.

**Results:** Our model estimated 309 infections over the lifetime of 100,000 simulated individuals with 94% of infections diagnosed (35% at early localized stage, 38% at early disseminated stage, 21% at late disseminated stage) and 6% of infections remaining undiagnosed. Of those diagnosed, 23% developed sequelae (arthritic, cardiac, neurologic), and 9% developed PTLDS. LD resulted in a loss of 70.59 QALYs over the lifetime of 100,000 individuals. Sensitivity and scenario analysis revealed that increasing LD incidence rates, potential underreporting, duration of PTLDS, and quality-of-life (health state utility) associated with PTLDS had the greatest impact on health burden.

**Interpretation:** Lyme disease contributes considerable health burden in terms of QALYs lost. Our analysis provides evidence to understand the disease burden and lays the foundation to assess the value of potential pharmaceutical and non-pharmaceutical interventions.

## INTRODUCTION

Lyme disease (LD) is the most commonly reported vector-borne disease in North America, (1–3) with incidence rates of up to 130 per 100,000 in Maine, United States (US), (4) and 85 per 100,000 in high risk areas of Ontario, Canada.(5)

Untreated LD at early stages can lead to: Lyme meningitis, cranial nerve neuropathies like Bell’s palsy, Lyme carditis, and Lyme arthritis. (6) A recent systematic review of long-term sequelae and health-related quality-of-life of patients with confirmed LD showed that post-treatment Lyme disease syndrome (PTLDS) may result in impaired quality-of-life.(7) PTLDS is defined as persistent symptoms for at least 6 months post-treatment of LD that was documented by a physician and treated with standard-of-care antibiotics. (8) There are risks for physical and neurologic sequelae associated with laboratory-confirmed LD, (9) and the economic burden is similar to other vector-borne diseases, such as West Nile virus and Zika virus.(10)

Three Markov cohort models have previously been developed for LD, two assessing the cost-effectiveness of LD vaccination versus no vaccination, (11,12) and one assessing oral therapy versus intravenous administration of antibiotics.(13) However, these cohort models assumed a homogeneous patient population, did not incorporate LD diagnostics, individual-level characteristics, or the entire disease progression of LD (i.e., PTLDS). Individual and population-level burden of LD are not well understood for several reasons including the relative novelty of the disease in certain regions of North America, lower incidence rates, and lack of follow-up on long-term outcomes. In these instances, microsimulation models can be helpful in simulating the disease history based on current evidence from the literature and surveillance programs to inform estimates of the impact of LD on health outcomes. There is a need for updated models to include updated case definitions, diagnostic effectiveness, treatment, and disease progression.

1  
2  
3 The objective of this study was to develop an individual-level state-transition model to estimate the health  
4 burden associated with Lyme disease in Ontario, Canada. This model will report health burden in terms of  
5 number of LD cases and quality-adjusted life years (QALYs). QALYs consider morbidity and mortality  
6 of patients, taking into account life years and the quality-of-life experienced by patients; they are a  
7 common measure in burden of disease studies to capture all effects of diseases and to allow for  
8 comparisons to other health conditions.(14)  
9  
10  
11  
12  
13  
14  
15  
16  
17  
18

## 19 **METHODS**

### 20 **Target population and setting**

21  
22 We developed an individual-level, state-transition model to simulate persons representative of the  
23 population of Ontario in 2017 where approximately 14 million individuals reside. We simulated a cross-  
24 sectional cohort of 100,000 individuals in Ontario with a mean (SD) age of 37.62 (22.67) years, 51%  
25 female and 63% (8.8M/13.98M) residing in high-risk areas (personal communication, Public Health  
26 Ontario). The life expectancy was 81.02 years, simulating a “lifetime” LD infection risk over  
27 approximately 43 years. Individual characteristics (age, sex, risk area of residence) were sampled from  
28 distributions informed by census data. (15) Figure 1 shows a model schematic with possible trajectories  
29 for individuals: infected with LD, diagnosed, progression to various LD stages, or recovery, in weekly  
30 time step. We reported health outcomes per 100,000 including: the number of LD cases (early localized,  
31 early disseminated, and late disseminated), sequelae including PTLDS, and QALYs. Outcomes are  
32 accrued over the patient’s lifetime and discounted at 1.5%.(16) All modelling and analyses were  
33 conducted using Treeage Pro (Treeage Software, Inc., Williamstown, MA).  
34  
35  
36  
37  
38  
39  
40  
41  
42  
43  
44  
45  
46  
47  
48  
49  
50  
51  
52  
53  
54  
55  
56  
57  
58  
59  
60

## Model structure

### *Lyme disease incidence and exposure*

We assumed that individuals enter the model in a “Healthy (susceptible)” state. There is a probability that these individuals can be bit by an infected tick and develop LD using age- and sex-dependent 2017 incidence rates reported from Public Health Ontario. Age-dependent incidence rates ranged between 2.9 and 10 per 100,000 for females, and 5.0 and 13.9 per 100,000 for males (Appendix 1). We assumed LD infections are caused by the dominant strain in Ontario, *Borrelia burgdorferi (sensu stricto)*.

Those developing an erythema migrans (EM) rash may be clinically diagnosed and transition to the “Early localized” health state. Individuals presenting with EM can be misdiagnosed depending on LD awareness,(15) and remain undiagnosed in the “Infected” state. Once a diagnostic test confirms LD diagnosis, individuals transition to: “early localized”, “early disseminated”, or “late disseminated” health states depending on the time since initial infection, which is defined as between 0 and 30, 31 and 90, and 90 days and onwards, respectively.

### *Diagnostic testing*

Diagnostic two-tier tests with negative, and positive results are typically returned within 1, and 2 weeks, respectively.(18) Undiagnosed individuals in the “Infected” state have a weekly probability of getting tested depending on whether or not they develop sequelae. An average of 80.4% (63% to 98% depending on sequelae) of individuals would receive a test if presenting with sequelae from the initial infection, and 40.2% if not. (19) Sensitivity and specificity were extracted from a meta-analysis, stratified by LD stage. Sensitivity for early localized, early disseminated, and late disseminated LD was 46.3%, 89.7% and 99.4%, respectively, while specificity was between 99.3% and 99.7%.(20)

### *LD sequelae and manifestations*

. In the early disseminated stage, multiple EM, cardiac abnormalities, cranial nerve palsies, and other neurologic sequelae (meningitis and polyneuropathy) can develop, whereas in the late disseminated stage, arthritic and cognitive sequelae can develop.(7) The one-year, sex-dependent probability of developing

1  
2  
3 early disseminated and late disseminated stage sequelae was informed by population-based health  
4 administrative data in Ontario to be 17%, and 10-11%, respectively.  
5  
6

7  
8 Individuals diagnosed clinically or with laboratory-confirmation receive 2-3 weeks of oral antibiotics,  
9 which may be followed by subsequent courses of intravenous antibiotics depending on the sequelae  
10 experienced.(22) We define treatment success as absence of sequelae or manifestations of the respective  
11 LD stage (i.e., no more persistent symptoms). On treatment, individuals have a 4-6% chance of  
12 experiencing minor or major adverse events from antibiotic treatment, (13) and 85-95% of recovery. (23–  
13 28) Unsuccessful treatment led to possible PTLDS development; we assumed with expert guidance that  
14 PTLDS persists for five years. After recovery (from any LD stage), individuals are assumed to be immune  
15 from re-infection for six months.  
16  
17  
18  
19  
20  
21  
22  
23

#### 24 *Utilities*

25  
26 Health state utility values are preference values for being in a health state used to measure the quality-of-  
27 life (morbidity) in conjunction with life years to output quality-adjusted life years (QALYs). Mean utility  
28 values for the Ontario population ranged from 0.616 to 0.902, depending on age and sex.(15) Utilities for  
29 LD health states were extracted from a systematic review, (7) and corresponded to the experienced  
30 sequelae. For example, an individual with cranial nerve palsy would have a utility of 0.61 individuals with  
31 PTLDS have a utility of 0.54.(12) All parameters are summarized in Table 1.  
32  
33  
34  
35  
36  
37  
38  
39

#### 40 **Analysis**

##### 41 *Base-case analysis*

42  
43 We simulated 100,000 individuals with a risk of LD infection throughout their lifetime, assuming that  
44 treatment starts after clinical diagnosis, or laboratory confirmation. The likelihood of clinical diagnosis  
45 after presenting with EM in high, and low exposure areas was 58%, and 26%, respectively.(19) We also  
46 simulated the health burden for 1 million individuals in Ontario over a 1-year risk of LD infection to  
47 contextualize annual health burden.  
48  
49  
50  
51  
52  
53  
54  
55  
56  
57  
58  
59  
60

### *Assessing uncertainty*

We conducted various scenario analyses to examine the impact of assumptions made, and influential parameters in plausible LD scenarios including increasing LD incidence rates over time. In this scenario, we increased the incidence annually by 1 per 100,000 for each age group for the next 10 years. All scenarios are described in Appendix 2.

We conducted deterministic one-way sensitivity analysis to assess the robustness of model results to key parameters. We followed modeling best practices.(31)

## **RESULTS**

### **Base-case**

In total, there were 309 infections per 100,000, of which 4 (1.3%) were re-infections. From the 309 infections, 289 (94%) were diagnosed, and 20 (6%) remained undiagnosed. All results are summarized in Table 2. The mean (SD) age at the time of infection was 54.6 (17.9) years, with most infections in the 50-55, and 60-65 age groups (Appendix 3). The median (range) duration of LD infection was 7 (2 – 260) weeks (Appendix 4). Median (IQR) time from infection to diagnosis, and from infection to treatment was 5 (3-6), and 6 (4-7) weeks, respectively (Appendix 5-6).

Of the 309 diagnosed cases, 107 (35%) cases were diagnosed at the early localized stage with 45 (42%) of those clinically diagnosed, and 62 (58%) diagnosed through laboratory confirmation. Laboratory-confirmed diagnosis of early disseminated and late disseminated stage cases were 118 (38%), and 64 (21%), respectively.

Individuals progressing into the early disseminated stage of LD developed disseminated/multiple EM (n=10), cranial nerve palsy (n=4), cardiac abnormalities (n=19), and other neurological sequelae (meningitis, polyneuropathy) (n=9). Individuals who were diagnosed with, or progressed to, late disseminated LD developed arthritis (n=16) and cognitive sequelae (n=8). Of those diagnosed, 25 (9%)

1  
2  
3 developed PTLDS. Over the lifetime of 100,000 individuals, LD resulted in a loss of 70.59 QALYs,  
4  
5 discounted at 1.5%, or 102.90 QALYs undiscounted.  
6  
7

8 In the cross-sectional cohort of 1 million individuals in Ontario at risk of LD infection for one year  
9  
10 (Appendix 7), there were 53 LD infections, with most infections diagnosed at the early localized (40%)  
11  
12 and early disseminated stages (38%). Approximately 17% of individuals developed sequelae, 9% were  
13  
14 diagnosed with PTLDS, and no one was re-infected. Given the low probability of being re-infected within  
15  
16 one year, no re-infections were expected. In this scenario, one year of LD risk resulted in a loss of 19.38  
17  
18 QALYs. For Ontario (population of approximately 14M) this translates to 271 QALYs lost resulting from  
19  
20 LD infections in one-year.  
21

### 22 23 **Assessing uncertainty**

24  
25 The tornado diagram (Figure 2) summarizes multiple one-way sensitivity analyses of all parameters'  
26  
27 impact on QALYs lost. The following parameters have the most impact: duration of the PTLDS stage,  
28  
29 utility value for PTLDS, probability of full recovery post-treatment, probability of developing an EM  
30  
31 rash, and diagnostic test performance.  
32  
33

34  
35 When the duration of PTLDS state was one-year, fewer QALYs are lost at 50.36, whereas being in the  
36  
37 PTLDS health state for an average of 10 years resulted in 87.74 QALYs lost. At the higher estimate for  
38  
39 PTLDS utility value of 0.70, 58.25 QALYs were lost. A lower utility value of 0.30 resulted in 89.11  
40  
41 QALYs lost. With the probability of recovery at its upper limit (e.g., close to 100% chance of recovery),  
42  
43 there is a total of 68.52 QALYs lost, whereas the lower limit resulted in 85.97 QALYs lost. These  
44  
45 sensitivity analyses suggest that the disease progression towards PTLDS, and this stage of LD  
46  
47 substantially contribute to the health burden associated with LD infections.  
48  
49

50 The other major influential parameter was LD incidence (Appendix 2). In a scenario where LD incidence  
51  
52 rates increased by 1 per 100,000 annually over the next 10 years, 165.51 QALYs were lost.  
53

54 Underreporting factors of 3 (Canadian estimate), and 10 (US estimate) resulted in 257.48 and 881.30  
55  
56  
57  
58  
59  
60



1  
2  
3 QALYs lost, respectively. Increased awareness of LD, translated as increased probability of clinical  
4 diagnosis of EM, resulted in fewer QALYs lost (i.e., lesser health burden).  
5  
6  
7  
8  
9

## 10 11 **INTERPRETATION**

12  
13  
14 We developed an individual-level state transition model to estimate LD health burden over the lifetime of  
15 100,000 individuals in Ontario. LD resulted in 71 QALYs lost, with 23% of individuals developing  
16 sequelae and 9% developing PTLDS. The number of individuals developing PTLDS was similar to the  
17 10% reported in the literature,(29) and may be slightly underestimated since 6% of individuals remained  
18 undiagnosed. The duration of PTLDS, and the quality-of-life associated with the health state had a  
19 significant effect on the overall burden as shown in the sensitivity analyses. While it is uncommon in  
20 most cases of LD, given appropriate diagnosis and treatment, further research and understanding of this  
21 PTLDS can aid in reducing LD health burden.  
22  
23  
24  
25  
26  
27  
28  
29  
30

31 Scenarios modeled also suggest that the health burden resulting from LD can be reduced by introducing  
32 interventions to lower the ecological transmission of *Borrelia burgdorferi* in hosts to reduce LD incidence  
33 rates, or reduce the number of individuals who may be susceptible to LD. Previous Markov models  
34 assessing the cost-effectiveness of a LD vaccine concluded that LD incidence rate was highly influential  
35 towards the economic value of interventions. (11,12)  
36  
37  
38  
39  
40  
41  
42

43 In a descriptive study of 2005-2014 LD cases in Ontario, the proportion of individuals notifying public  
44 health systems within 30 days, 1-3 months, and >3 months of symptom onset was 45.2%, 38%, and  
45 16.8%, respectively.(17) Our model similarly reports that 35% of cases are diagnosed (and reported)  
46 within 30 days, 38% within 1-3 months, and 21% after 3 months. The differences between our results can  
47 be attributed to how our model considers LD stage at diagnosis based on time from tick bite/infection and  
48 sequelae developed post-infection, which is difficult to identify using administrative data. Instead,  
49 Johnson and colleagues classify LD stage by manifestations and patient-reported symptoms.(17) Our  
50  
51  
52  
53  
54  
55  
56  
57  
58  
59  
60

1  
2  
3 results suggest that while some individuals may have and report symptoms of acute LD, they may be  
4  
5 diagnosed in the later stages.  
6

7  
8 Despite our best efforts to compare to other literature estimates of infectious diseases' burden in terms of  
9  
10 QALYs, to our knowledge, there are none that report this in similar overall context. An Ontario Burden of  
11  
12 Infectious Diseases Study from 2012 estimated the annual burden of 51 infectious diseases in terms of  
13  
14 health-adjusted life years (HALYs), which similarly to the QALY, is a composite measure that  
15  
16 incorporates both mortality (years of life lost) and morbidity (year-equivalents of reduced functioning).  
17  
18 (32) In an indirect comparison, LD's annual burden (271 QALYs) is similar in magnitude to herpes  
19  
20 simplex virus (256 HALYs), and pertussis (220 HALYs), a pathogen which contributed zero years of life  
21  
22 lost but many year-equivalents of reduced functioning. (32)  
23

## 24 25 **Limitations**

26  
27 Our study has several limitations. The overall health burden estimated by our model is likely to be  
28  
29 conservative given we only considered the *Borrelia burgdorferi* strain, and assumed that sequelae are  
30  
31 mutually exclusive. The probability of developing sequelae may be underestimated as it was extracted  
32  
33 from an Ontario laboratory-confirmed LD cohort with accrual between 2006-2013, when incidence rates  
34  
35 of LD were lower.  
36

37  
38 Much remains unclear surrounding PTLDS: diagnosis, treatment and recovery. (34) As a result, we had to  
39  
40 assume the average duration of the PTLDS health state. In our sensitivity analysis, we showed that  
41  
42 PTLDS (duration, and utility value) was influential towards QALYs lost, indicating that this is an area for  
43  
44 future research. Our model does not consider seasonality; we assumed that health burden resulting from  
45  
46 LD can be simplified to result from a uniform infection risk throughout the year.  
47

48  
49 This individual-level state transition model simulated the disease history of LD from infection and to end-  
50  
51 of-life, capturing individual differences (e.g., age, sex, probability of residing in high-risk areas) to  
52  
53 estimate population-level health burden. Reporting QALYs lost is critical in understanding the overall  
54  
55  
56  
57  
58  
59  
60

1  
2  
3 burden of LD, a disease which rarely results in death. Decision-makers can adapt this model to evaluate  
4 the effectiveness, costs, and value of a potential vaccine, awareness and education campaigns, improved  
5 diagnostics, or interventions to reduce the probability of an infected individual developing PTLDS.  
6  
7  
8  
9  
10

## 11 12 **CONCLUSION**

13  
14  
15  
16 Based on our model, LD infection in Ontario, Canada, contributes considerable health burden in terms of  
17 quality-adjusted life years, resulting from potential sequelae, undiagnosed cases, and individuals with  
18 PTLDS. The incidence rate of LD, and PTLDS (duration and quality-of-life) were most influential to  
19 model results and should be the focus of future research and interventions.  
20  
21  
22  
23  
24  
25  
26  
27  
28  
29  
30  
31  
32  
33  
34  
35  
36  
37  
38  
39  
40  
41  
42  
43  
44  
45  
46  
47  
48  
49  
50  
51  
52  
53  
54  
55  
56  
57  
58  
59  
60

**REFERENCES**

1. Centers for Disease Control and Prevention. Why is CDC concerned about Lyme disease? [Internet]. 2017 [cited 2020 Aug 3]. Available from: <https://www.cdc.gov/lyme/why-is-cdc-concerned-about-lyme-disease.html>
2. Rochlin I, Ninivaggi D V., Benach JL. Malaria and Lyme disease - The largest vector-borne US epidemics in the last 100 years: Success and failure of public health. *BMC Public Health*. 2019;19(1):1–11.
3. Mead PS. Epidemiology of Lyme Disease. *Infect Dis Clin North Am*. 2015;29(2):187–210.
4. Centers for Disease Control and Prevention. Lyme disease data tables [Internet]. 2017 [cited 2018 Feb 5]. Available from: <https://www.cdc.gov/lyme/stats/tables.html>
5. Nelder MP, Wijayasri S, Russell CB, Johnson KO, Cronin K, Johnson S. The continued rise of Lyme disease in Ontario , Canada: 2017. *Can Commun Dis Rep*. 2018;44:231–6.
6. Kugeler KJ, Griffith KS, Gould LH, Kochanek K, Delorey MJ, Biggerstaff BJ, et al. A Review of Death Certificates Listing Lyme Disease as a Cause of Death in the United States. *Clin Infect Dis* [Internet]. 2011 Feb 1 [cited 2017 Dec 22];52(3):364–7. Available from: <https://academic.oup.com/cid/article-lookup/doi/10.1093/cid/ciq157>
7. Mac S, Bahia S, Simbulan F, Pullenayegum EM, Evans GA, Patel SN, et al. Long-Term Sequelae and Health-Related Quality of Life Associated With Lyme Disease: A Systematic Review. *Clin Infect Dis*. 2020;71(2):440–52.
8. Aucott JN. Posttreatment Lyme Disease Syndrome. *Infect Dis Clin N Am*. 2015;29:309–23.
9. Mac S, Jung J, Kopp A, Evans G, Pullenayegum E, Patel SN, et al. Estimating Health Burden Attributable to Laboratory-Confirmed Lyme Disease in Ontario, Canada: A Population-Based Matched Cohort Study Using Health Administrative Data. *Med Decis Mak*. 2019;40(1):E102–3.

10. Mac S, da Silva SR, Sander B. The economic burden of lyme disease and the cost-effectiveness of lyme disease interventions: A scoping review. *PLoS One*. 2019;14(1):e0210280.
11. Hsia EC, Chung JB, Schwartz JS, Albert DA, E.C. H, J.B. C, et al. Cost-effectiveness analysis of the Lyme disease vaccine. *Arthritis Rheum*. 2002;46(6):1651–60.
12. Shadick NA, Liang MH, Phillips CB, Fossel K, Kuntz KM, N.A. S, et al. The cost-effectiveness of vaccination against Lyme disease. *Arch Intern Med*. 2001;161(4):554–61.
13. Eckman MH, Steere AC, Kalish RA, Pauker SG, M.H. E, A.C. S, et al. Cost effectiveness of oral as compared with intravenous antibiotic therapy for patients with early Lyme disease or Lyme arthritis. *N Engl J Med*. 1997;337(5):357.
14. Gold MR, Stevenson D, Fryback DG. HALYs and QALYs and DALYs, oh my: Similarities and differences in summary measures of population health. *Annu Rev Public Health*. 2002;23:115–34.
15. Guertin JR, Feeny D, Tarride JE. Age- and sex-specific Canadian utility norms, based on the 2013-2014 Canadian Community Health Survey. *CMAJ*. 2018;190(6):E155–61.
16. Canadian Agency for Drugs and Technologies in Health (CADTH). Guidelines for the Economic Evaluation of Health Technologies: Canada. 4th ed. 2017. 1–76 p.
17. Johnson KO, Nelder MP, Russell C, Li Y, Badiani T, Sander B, et al. Clinical manifestations of reported Lyme disease cases in Ontario, Canada: 2005–2014. *PLoS One*. 2018;13(6).
18. Public Health Ontario. Lyme Disease – Serology [Internet]. 2020 [cited 2020 Sep 23]. Available from: <https://www.publichealthontario.ca/en/laboratory-services/test-information-index/lyme-disease-serology>
19. Henry B, Crabtree A, Roth D, Blackman D, Morshed M. Lyme disease: Knowledge, beliefs, and practices of physicians in a low-endemic area. *Can Fam Physician*. 2012;58(5):289–95.
20. Waddell LA, Greig J, Mascarenhas M, Harding S, Lindsay R, Ogden N. The accuracy of

- 1  
2  
3 diagnostic tests for lyme disease in humans, a systematic review and meta-analysis of north  
4  
5 American research. PLoS One. 2016;11(12):1–23.  
6  
7
- 8 21. Health Quality Ontario. Clinical Guidance Document: Management of Tick Bites and  
9  
10 Investigation of Early Localized Lyme Disease [Internet]. 2018 [cited 2020 Sep 25]. Available  
11  
12 from: [https://www.hqontario.ca/Portals/0/documents/evidence/qs-clinical-guidance-lyme-disease-](https://www.hqontario.ca/Portals/0/documents/evidence/qs-clinical-guidance-lyme-disease-en.pdf)  
13  
14 [en.pdf](https://www.hqontario.ca/Portals/0/documents/evidence/qs-clinical-guidance-lyme-disease-en.pdf)  
15
- 16 22. Wormser GP, Dattwyler RJ, Shapiro ED, Halperin JJ, Steere AC, Klemperer MS, et al. The  
17  
18 Clinical Assessment, Treatment, and Prevention of Lyme Disease, Human Granulocytic  
19  
20 Anaplasmosis, and Babesiosis: Clinical Practice Guidelines by the Infectious Diseases Society of  
21  
22 America. Clin Infect Dis. 2006;43(9):1089–134.  
23
- 24 23. Magid D, Schwartz B, Craft J, Schwartz S. Prevention of Lyme Disease After Tick Bites. A Cost-  
25  
26 Effectiveness Analysis. N Engl J Med. 1992;327(23):534–41.  
27
- 28 24. Liu NY, Dinerman H, Levin RE, Massarotti E, Molloy PJ, Schoen RT, et al. Randomized trial of  
29  
30 doxycycline vs. amoxicillin/probenecid for the treatment of Lyme arthritis: treatment of non-  
31  
32 responders with intravenous penicillin or ceftriaxone . In: Arthritis Rheum [Internet]. 1989 [cited  
33  
34 2020 Sep 23]. p. 32-S46. Available from:  
35  
36 <https://connects.catalyst.harvard.edu/Profiles/display/1010621>  
37  
38
- 39 25. Steere AC, Taylor E, McHugh GL, Logigian EL. The Overdiagnosis of Lyme Disease. JAMA J  
40  
41 Am Med Assoc [Internet]. 1993 Apr 14 [cited 2020 Sep 23];269(14):1812–6. Available from:  
42  
43 <https://jamanetwork.com/journals/jama/fullarticle/405293>  
44  
45
- 46 26. Logigian EL, Steere AC. Clinical and electrophysiologic findings in chronic neuropathy of Lyme  
47  
48 disease. Neurology [Internet]. 1992 [cited 2020 Sep 23];42(2):303–11. Available from:  
49  
50 <https://pubmed.ncbi.nlm.nih.gov/1310529/>  
51  
52
- 53 27. Dattwyler RJ, Volkman DJ, Halperin JJ, Luft BJ. TREATMENT OF LATE LYME  
54  
55  
56  
57  
58  
59  
60

- 1  
2  
3 BORRELIOSIS-RANDOMISED COMPARISON OF CEFTRIAXONE AND PENICILLIN.  
4  
5 Lancet [Internet]. 1988 May 28 [cited 2020 Sep 23];331(8596):1191–4. Available from:  
6  
7 <https://pubmed.ncbi.nlm.nih.gov/2897008/>  
8  
9
- 10 28. Karlsson M, Hammers-Berggren S, Lindquist L, Stiernstedt G, Svenungsson B. Comparison of  
11 intravenous penicillin G and oral doxycycline for treatment of lyme neuroborreliosis. Neurology  
12 [Internet]. 1994 [cited 2020 Sep 23];44(7):1203–7. Available from:  
13  
14 <https://pubmed.ncbi.nlm.nih.gov/8035916/>  
15  
16
- 17 29. Rebman AW, Bechtold KT, Yang T, Mihm EA, Soloski MJ, Novak CB, et al. The Clinical,  
18 Symptom, and Quality-of-Life Characterization of a Well-Defined Group of Patients with  
19 Posttreatment Lyme Disease Syndrome. Front Med. 2017;4(224):1–10.  
20  
21
- 22 30. Aucott JN, Rebman AW, Crowder LA, Kortte KB. Post-treatment Lyme disease syndrome  
23 symptomatology and the impact on life functioning: Is there something here? Qual Life Res.  
24 2013;22(1):75–84.  
25  
26
- 27 31. Caro JJ, Briggs AH, Siebert U, Kuntz KM. Modeling good research practices--overview: a report  
28 of the ISPOR-SMDM Modeling Good Research Practices Task Force-1. Med Decis Mak.  
29 2012;32(5):667–77.  
30  
31
- 32 32. Kwong JC, Ratnasingham S, Campitelli MA, Daneman N, Deeks SL, Manuel DG, et al. The  
33 Impact of Infection on Population Health: Results of the Ontario Burden of Infectious Diseases  
34 Study. PLoS One. 2012;7(9).  
35  
36
- 37 33. Semproni M, Rusk R, Wuerz T. Fatal Lyme carditis presenting as fluctuating high-grade  
38 atrioventricular block. CMAJ. 2020;192(21):E574–7.  
39  
40
- 41 34. Rebman AW, Aucott JN. Post-treatment Lyme Disease as a Model for Persistent Symptoms in  
42 Lyme Disease. Front Med. 2020;7(February):1–16.  
43  
44
- 45 35. Shing E, Wang J, Khoo E, Evans GA, Moore S, Nelder MP, et al. Estimating direct healthcare  
46  
47  
48  
49  
50  
51  
52  
53  
54  
55  
56  
57  
58  
59  
60

1  
2  
3  
4  
5  
6  
7  
8  
9  
10  
11  
12  
13  
14  
15  
16  
17  
18  
19  
20  
21  
22  
23  
24  
25  
26  
27  
28  
29  
30  
31  
32  
33  
34  
35  
36  
37  
38  
39  
40  
41  
42  
43  
44  
45  
46  
47  
48  
49  
50  
51  
52  
53  
54  
55  
56  
57  
58  
59  
60

costs attributable to laboratory-confirmed Lyme disease in Ontario, Canada: A population-based  
matched cohort study using health administrative data. Zoonoses Public Health. 2019 Jan;

Confidential



## LIST OF TABLES

**Table 1. Key parameters and data sources**

| Parameter                                                                | Base-case value        | Type of Range | Range                | Data Sources                                              |
|--------------------------------------------------------------------------|------------------------|---------------|----------------------|-----------------------------------------------------------|
| <b>Probabilities</b>                                                     |                        |               |                      |                                                           |
| <i>Lyme disease</i>                                                      |                        |               |                      |                                                           |
| Probability of high-risk exposure                                        | 0.628                  | P, Range      | (0.471, 0.786)       | Personal communication, Public Health Ontario             |
| LD incidence rates [varies by age and sex]                               | 2.9 – 13.9 per 100,000 | Full, Range   | (0.000029, 0.000139) | Nelder 2018 (5)                                           |
| Probability of clinical diagnosis after EM rash, high-risk exposure area | 0.583                  | Full, Range   | (0.437, 0.729)       | Henry 2012 (19)                                           |
| Probability of clinical diagnosis after EM rash, low-risk area           | 0.261                  | P, Range      | (0.196, 0.326)       | Henry 2012 (19)                                           |
| <i>Diagnostics</i>                                                       |                        |               |                      |                                                           |
| Sensitivity, early localized                                             | 0.463                  | Full, 95%CI   | (0.391, 0.537)       | Waddell 2016 (20)                                         |
| Sensitivity, early disseminated                                          | 0.897                  | Full, 95%CI   | (0.783, 0.954)       | Waddell 2016 (20)                                         |
| Sensitivity, late disseminated                                           | 0.994                  | Full, 95%CI   | (0.957, 0.999)       | Waddell 2016 (20)                                         |
| Specificity, early localized                                             | 0.993                  | Full, 95%CI   | (0.983, 0.997)       | Waddell 2016 (20)                                         |
| Specificity, early disseminated                                          | 0.997                  | Full, 95%CI   | (0.984, 0.999)       | Waddell 2016 (20)                                         |
| Specificity, late disseminated                                           | 0.993                  | Full, 95%CI   | (0.985, 0.997)       | Waddell 2016 (20)                                         |
| Probability of testing [varies by (no) presence of sequelae]             | 0.402 – 0.805          | P, Range      | (0.30 – 0.98)        | Henry 2012 (19)                                           |
| Delay in results                                                         | 1 – 2 weeks            |               |                      | PHO 2017 (18)                                             |
| <i>Treatment</i>                                                         |                        |               |                      |                                                           |
| Treat efficacy, erythema migrans                                         | 0.85                   | Full, Range   | (0.80, 1.00)         | Magid 1992 (23)                                           |
| Treat efficacy, arthritic sequelae                                       | 0.85                   | Full, Range   | (0.40, 0.80)         | Liu 1989 (24)                                             |
| Treat efficacy, cardiac sequelae                                         | 0.90                   | Full, Range   | (0.80, 1.00)         | Steere 1993 (25)                                          |
| Treat efficacy, neurologic sequelae                                      | 0.90                   | Full, Range   | (0.76, 0.97)         | Logigian 1992 (26) Dattwyler 1988 (27) Karlsson 1994 (28) |
| Oral treatment completion                                                | 0.90                   | P, Range      | (0.68, 1.00)         | Magid 1992 (23)                                           |
| IV treatment completion                                                  | 0.99                   | P, Range      | (0.75, 1.00)         | Magid 1992 (23)                                           |
| Probability of adverse event, oral                                       | 0.04                   | P, Range      | (0.03, 0.05)         | Shadick 2001 (12)                                         |

|                                                                 |               |             |                |                                       |
|-----------------------------------------------------------------|---------------|-------------|----------------|---------------------------------------|
| Probability of adverse event, IV                                | 0.06          | P, Range    | (0.05, 0.08)   | Shadick 2001 (12)                     |
| <b>Outcomes</b>                                                 |               |             |                |                                       |
| Probability of hospitalization                                  | 0.047         | P, Range    | (0.035, 0.059) | Shing 2019 (35)                       |
| Length of hospitalization (days)                                | 7.9           | Full, 95%CI | (3.75, 12.05)  | Shing 2019 (35)                       |
| EM rash                                                         | 0.80          | P, Range    | (0.60, 1.00)   | Shadick 2001 (12)                     |
| Probability of developing sequelae [varies by LD stage and sex] | 0.10 – 0.17   | P, Range    | (0.08, 0.21)   | Unpublished data from cited study (9) |
| Arthritic   sequelae (M - F)                                    | 0.56 – 0.63   | P, Range    | (0.41, 0.76)   | Unpublished data from cited study (9) |
| Cardiac   sequelae (F - M)                                      | 0.43 – 0.48   | P, Range    | (0.29, 0.53)   | Unpublished data from cited study (9) |
| Cognitive   sequelae (F - M)                                    | 0.37 – 0.44   | P, Range    | (0.29, 0.58)   | Unpublished data from cited study (9) |
| Cranial nerve palsy   sequelae (F - M)                          | 0.11 – 0.24   | P, Range    | (0.08, 0.26)   | Unpublished data from cited study (9) |
| Multiple EM   sequelae (M - F)                                  | 0.22 – 0.36   | P, Range    | (0.16, 0.40)   | Unpublished data from cited study (9) |
| Meningitis or polyneuropathy   sequelae (F - M)                 | 0.06 - 0.11   | P, Range    | (0.12, 0.24)   | Unpublished data from cited study (9) |
| <b>Utilities</b>                                                |               |             |                |                                       |
| Healthy, stratified by age and sex                              | 0.616 - 0.902 | Full, 95%CI | (0.375, 0.983) | Guertin 2018 (15)                     |
| Arthritic sequelae                                              | 0.69          | Full, IQR   | (0.51, 0.86)   | Shadick 2001 (12)                     |
| Cardiac sequelae                                                | 0.61          | Full, IQR   | (0.38, 0.78)   | Shadick 2001 (12)                     |
| Cognitive sequelae                                              | 0.60          | Full, IQR   | (0.37, 0.73)   | Shadick 2001 (12)                     |
| Erythema migrans                                                | 0.80          | Full, IQR   | (0.70, 0.93)   | Shadick 2001 (12)                     |
| Cranial nerve palsy                                             | 0.61          | Full, IQR   | (0.36, 0.81)   | Shadick 2001 (12)                     |
| Meningitis or polyneuropathy                                    | 0.52          | Full, IQR   | (0.27, 0.73)   | Shadick 2001 (12)                     |
| PTLDS                                                           | 0.54          | Full, IQR   | (0.30, 0.70)   | Shadick 2001 (12)                     |
| Minor adverse events (disutility)                               | 0.05          | P, Range    | (0.038, 0.063) | Eckman 1997 (13)                      |
| Major adverse events (disutility)                               | 0.10          | P, Range    | (0.075, 0.125) | Eckman 1997 (13)                      |
| Oral treatment (disutility)                                     | 0.01          | P, Range    | (0.00, 0.01)   | Eckman 1997 (13)                      |
| Intravenous treatment (disutility)                              | 0.03          | P, Range    | (0.02, 0.04)   | Eckman 1997 (13)                      |

CI, confidence interval; EM, erythema migrans; F, female; IQR, interquartile range; IV, intravenous; M, male; P, plausible; PHO, Public Health Ontario; PTLDS, post-treatment Lyme disease syndrome; RR, relative risk

**Table 2. Base-case results per 100,000 in Ontario with lifetime risk of Lyme disease**

| <b>Outcomes</b>                           | <b>Incidence per 100,000, n (%)</b> |
|-------------------------------------------|-------------------------------------|
| <b>Total LD infections</b>                | 309                                 |
| <i>Diagnosed cases</i>                    | 289 (0.94)                          |
| Early localized                           | 107 (0.35)                          |
| Clinically diagnosed                      | 45 (0.42)                           |
| Lab-confirmed                             | 62 (0.58)                           |
| Early disseminated (Lab-confirmed)        | 118 (0.38)                          |
| Late disseminated (Lab-confirmed)         | 64 (0.21)                           |
| <i>Undiagnosed cases</i>                  | 20 (0.06)                           |
| <i>Re-infections</i>                      | 4 (0.01)                            |
| <b>Sequelae</b>                           |                                     |
| Arthritic                                 | 16 (0.06)                           |
| Cardiac                                   | 19 (0.07)                           |
| Cognitive                                 | 8 (0.03)                            |
| Cranial nerve palsy                       | 4 (0.01)                            |
| Multiple erythema migrans                 | 10 (0.03)                           |
| Neurological (meningitis, polyneuropathy) | 9 (0.03)                            |
| PTLDS                                     | 25 (0.09)                           |
| <b>QALYS</b>                              |                                     |
| Undiscounted                              | 102.90                              |
| Discounted (1.5%)                         | 70.59                               |

Abbreviations: LD, Lyme disease; LY, Life years; PTLDS, post-treatment Lyme disease syndrome;

QALY, quality-adjusted life year

1  
2  
3  
4  
5  
6  
7  
8  
9  
10  
11  
12  
13  
14  
15  
16  
17  
18  
19  
20  
21  
22  
23  
24  
25  
26  
27  
28  
29  
30  
31  
32  
33  
34  
35  
36  
37  
38  
39  
40  
41  
42  
43  
44  
45  
46  
47  
48  
49  
50  
51  
52  
53  
54  
55  
56  
57  
58  
59  
60

**LIST OF FIGURES**

**Figure 1. Model schematic of individual state-transition model**

**Figure 2. Sensitivity analysis of key parameters on health burden**

Confidential

Figure 1. Model schematic of individual state-transition model

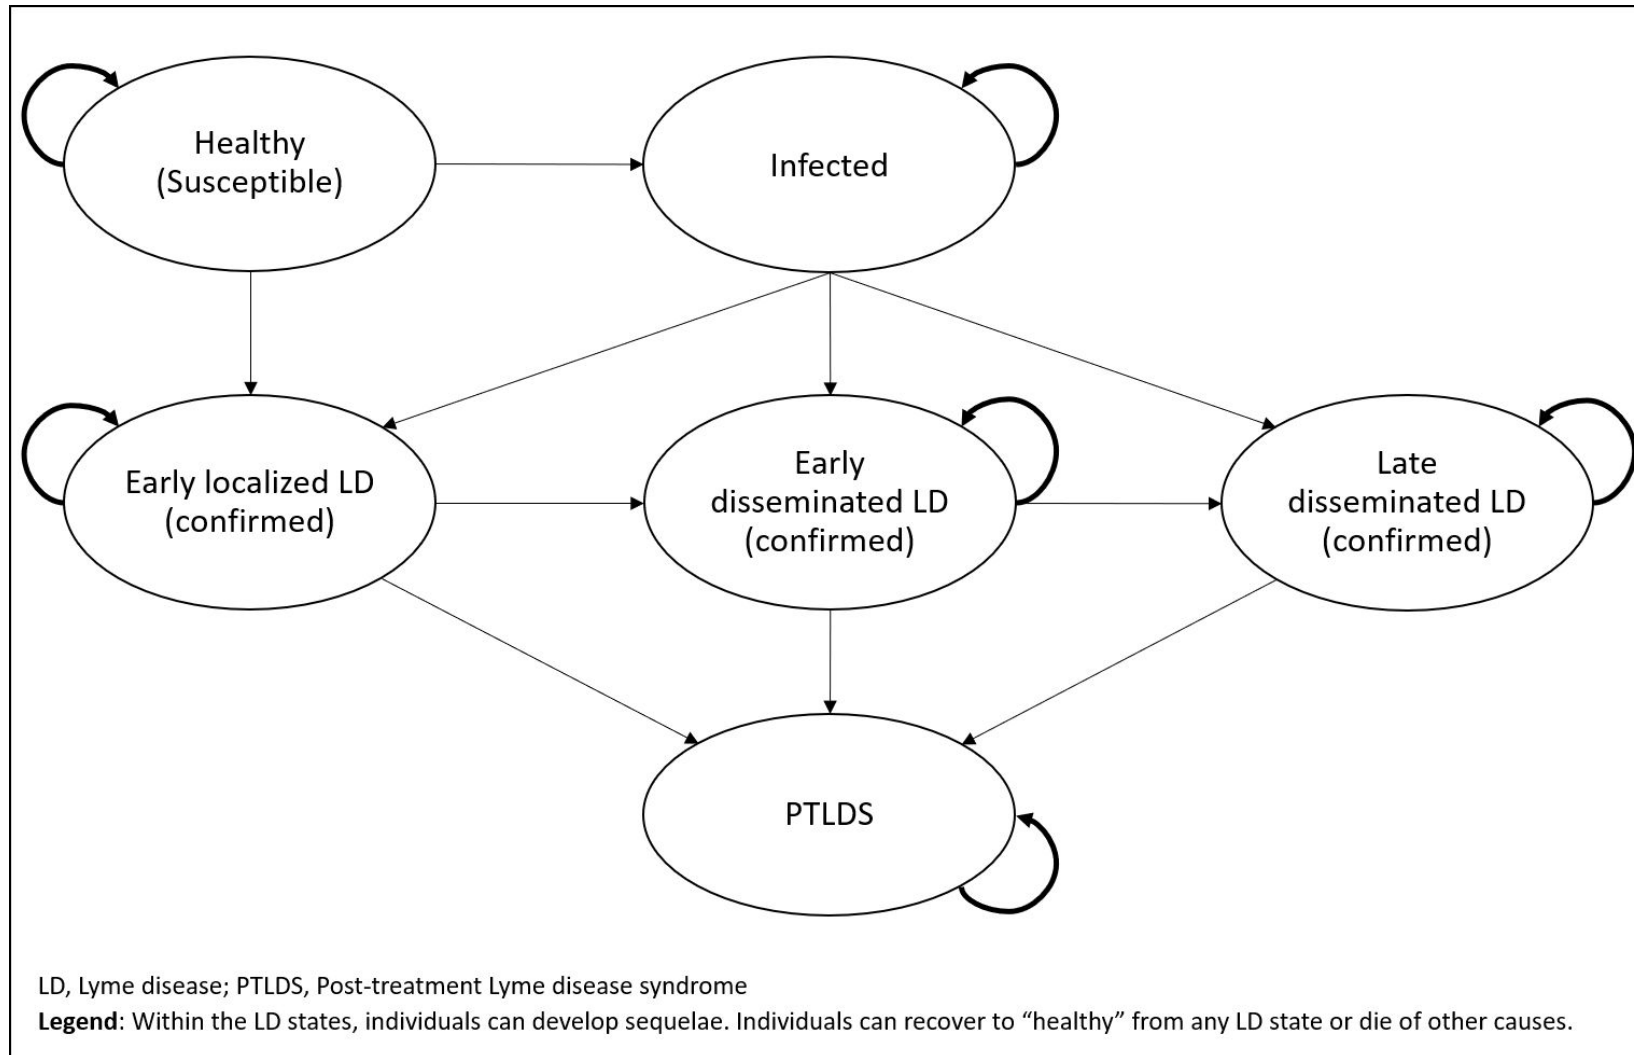

1  
2  
3  
4  
5  
6  
7  
8  
9  
10  
11  
12  
13  
14  
15  
16  
17  
18  
19  
20  
21  
22  
23  
24  
25  
26  
27  
28  
29  
30  
31  
32  
33  
34  
35  
36  
37  
38  
39  
40  
41  
42  
43  
44  
45  
46  
47

**Figure 2. Sensitivity analysis of key parameters on health burden**

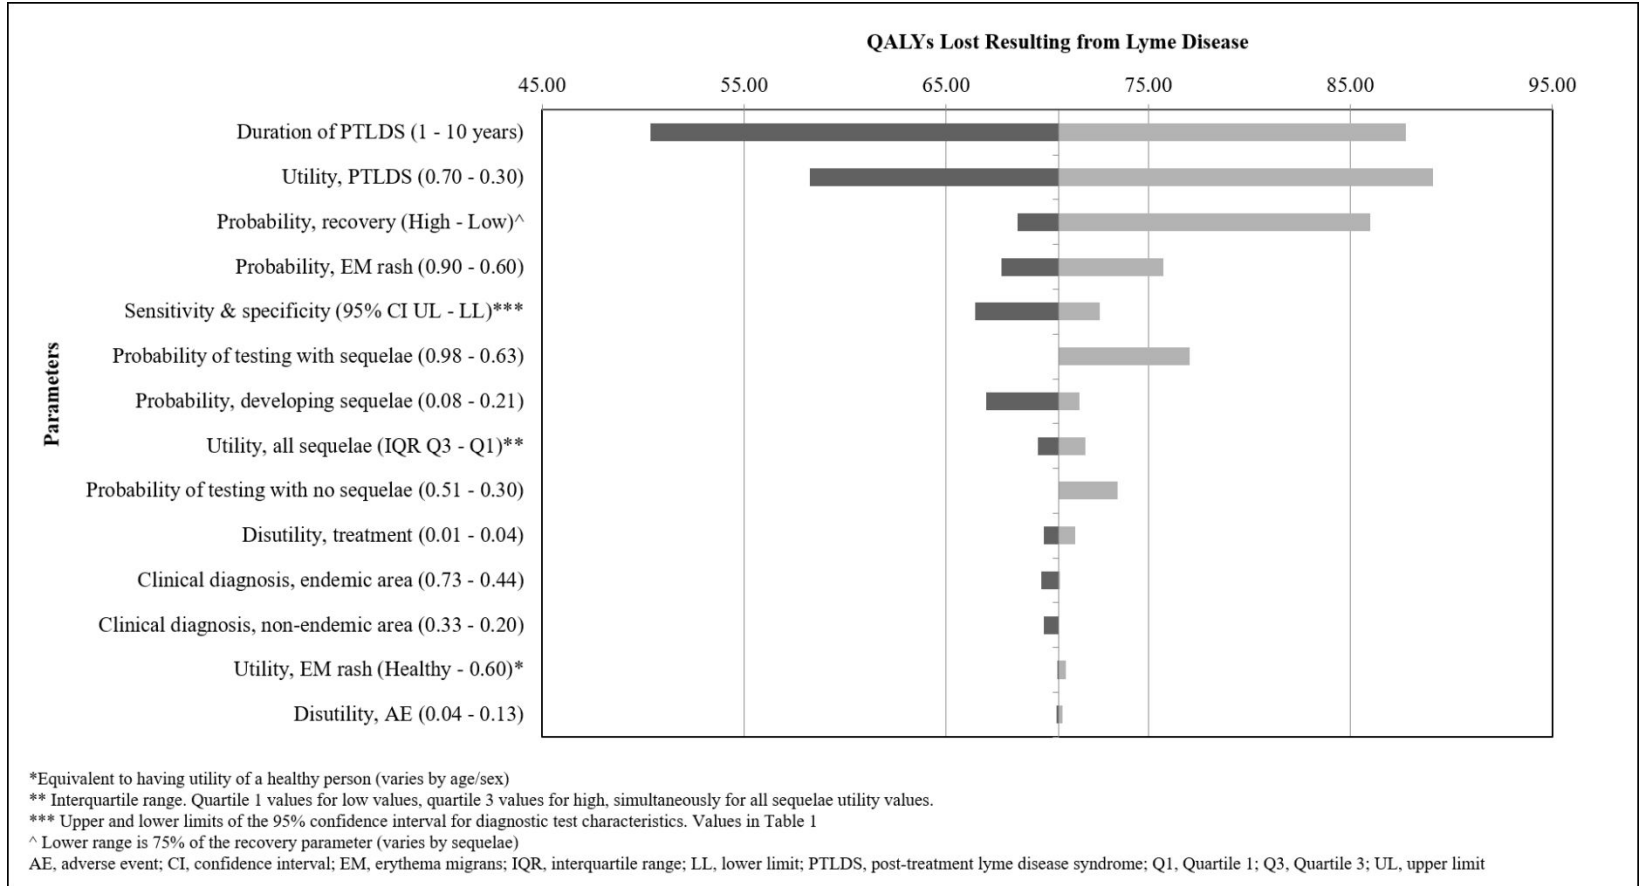

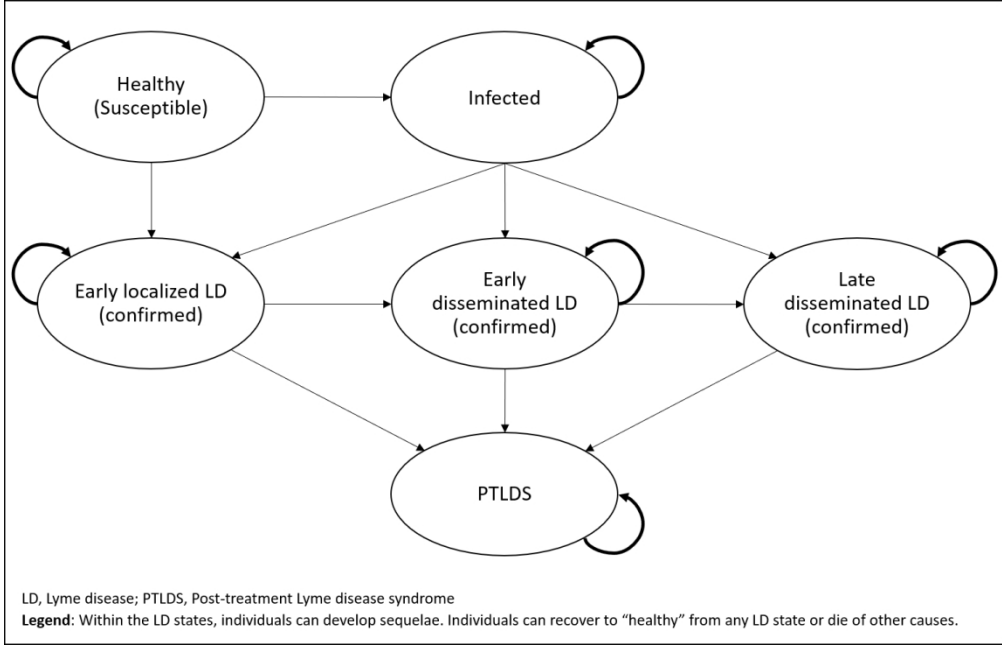

Figure 1. Model schematic of individual state-transition model

257x166mm (150 x 150 DPI)

1  
2  
3  
4  
5  
6  
7  
8  
9  
10  
11  
12  
13  
14  
15  
16  
17  
18  
19  
20  
21  
22  
23  
24  
25  
26  
27  
28  
29  
30  
31  
32  
33  
34  
35  
36  
37  
38  
39  
40  
41  
42  
43  
44  
45  
46  
47  
48  
49  
50  
51  
52  
53  
54  
55  
56  
57  
58  
59  
60

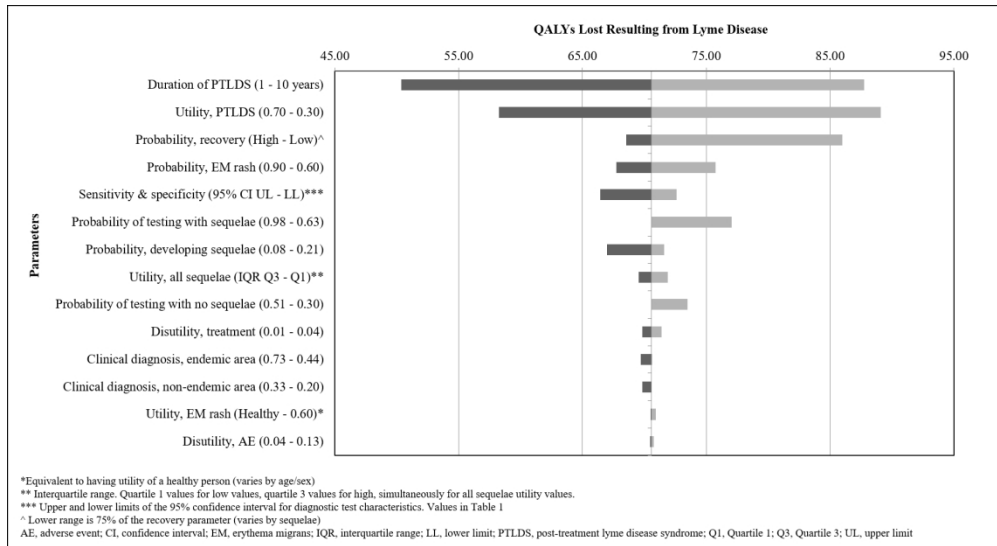

Figure 2. Sensitivity analysis of key parameters on health burden

325x176mm (150 x 150 DPI)



**APPENDIX****Appendix 1. Lyme disease incidence by age and sex in Ontario in 2017**

| AGE GROUPS | Female         |                | Male           |                |
|------------|----------------|----------------|----------------|----------------|
|            | Reported cases | Incidence rate | Reported cases | Incidence rate |
| ≤ 14       | 41             | 0.000029       | 71             | 0.000050       |
| 15 to 49   | 108            | 0.000075       | 199            | 0.000139       |
| 50 to 65   | 143            | 0.000100       | 181            | 0.000126       |
| ≥ 65       | 94             | 0.000066       | 121            | 0.000085       |

**Appendix 2. Scenario analysis descriptions and results by descending health burden**

| Scenario                                                     | Description and Rationale                                                                                                                                                                                                                                                                                     | QALYs Lost |
|--------------------------------------------------------------|---------------------------------------------------------------------------------------------------------------------------------------------------------------------------------------------------------------------------------------------------------------------------------------------------------------|------------|
| A. Underreporting (factor of 10)                             | Estimate of possible underreporting in United States. Rationale: To explore true burden if underreporting factor is as concluded by Kuehn 2013 (46)                                                                                                                                                           | 881.30     |
| B. Underreporting (factor of 3)                              | Rough estimate of possible underreporting in Canada. Rationale: To explore true burden if underreporting factor is as concluded by Ogden 2019 (47)                                                                                                                                                            | 257.48     |
| C. LD incidence Increasing for 10 years                      | Increase by 1 per 100,000 for each age group (by sex), in each of the next 10 years before becoming stable over the lifetime of all individuals. Rationale: To explore increasing risk areas                                                                                                                  | 165.51     |
| D. Assuming persistent symptoms for those undiagnosed for LD | This scenario assumes that undiagnosed individuals may experience persistent symptoms similar to PTLDS, but are not captured since they cannot be diagnosed with PTLDS without an appropriate diagnosis and treatment for LD. Rationale: To explore possible burden when including those who are undiagnosed. | 85.29      |
| E. Increased awareness for EM being diagnostic               | Probability of clinical diagnosis in the presence of EM rash of 90% in all areas (high and low-risk). Rationale: To explore increase in early clinical diagnosis in high risk and low risk exposure areas.                                                                                                    | 68.64      |
| F. Ontario: 1 M individuals, 1 year risk of LD infection     | Burden for 1 million Ontarians over 1 year of risk of LD infection, discounted at 1.5%                                                                                                                                                                                                                        | 19.38      |

**Appendix 3. Age distribution of Lyme disease cases**

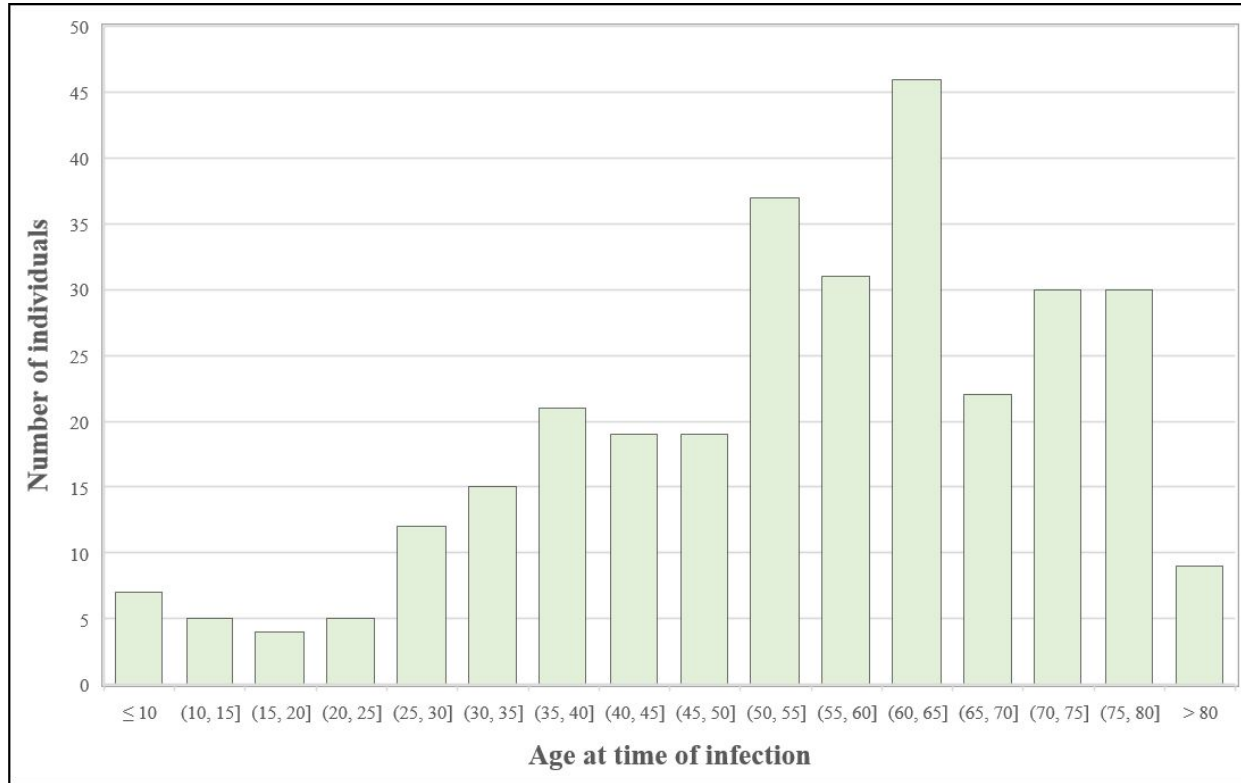

**Appendix 4. Distribution of duration of active Lyme disease infection**

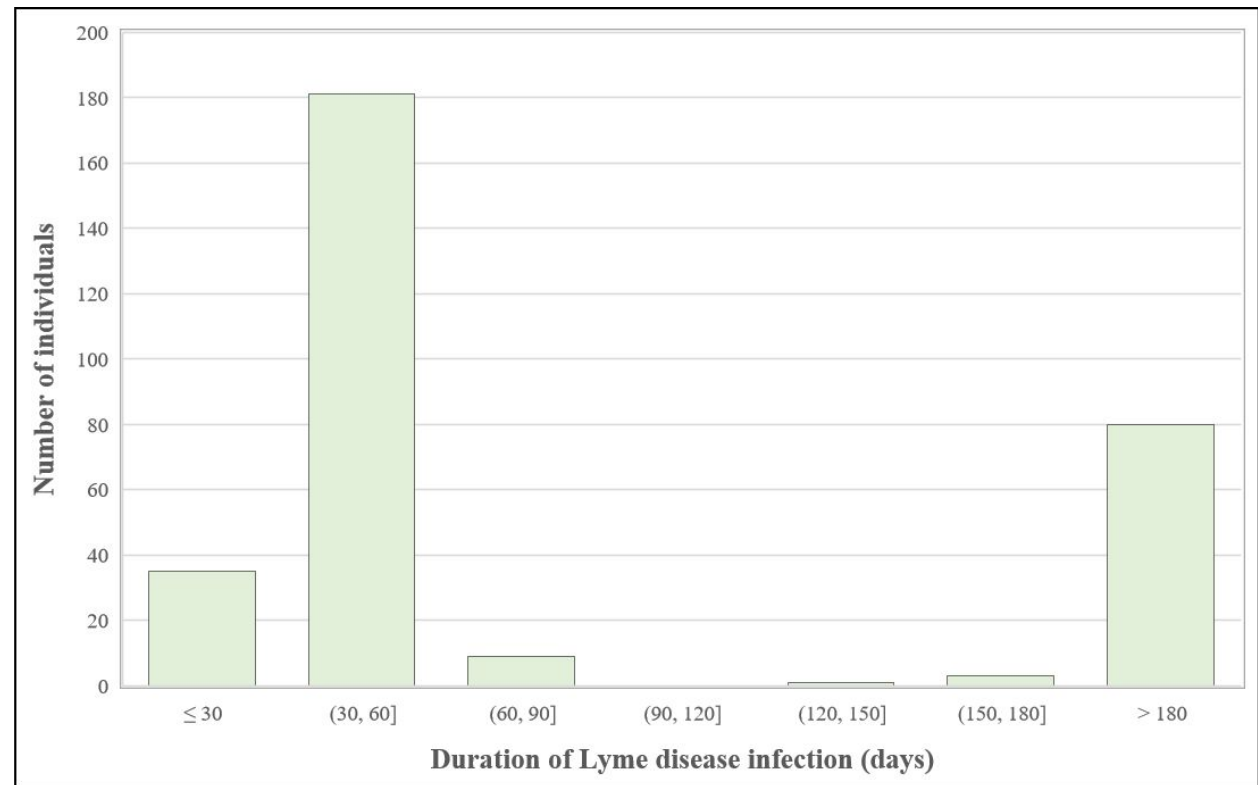

**Appendix 5. Distribution of time from infection to diagnosis**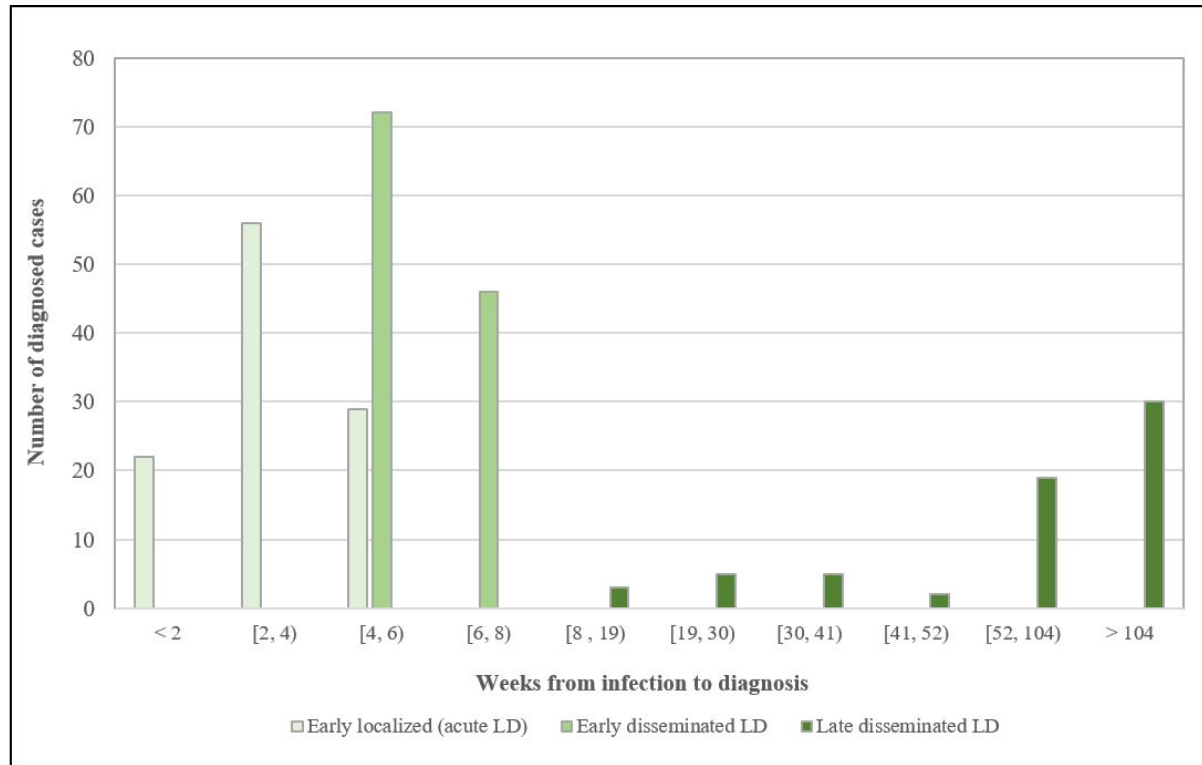

Note: The horizontal axis time intervals (weeks) are not uniform.

1  
2  
3  
4  
5  
6  
7  
8  
9  
10  
11  
12  
13  
14  
15  
16  
17  
18  
19  
20  
21  
22  
23  
24  
25  
26  
27  
28  
29  
30  
31  
32  
33  
34  
35  
36  
37  
38  
39  
40  
41  
42  
43  
44  
45  
46  
47

**Appendix 6. Distribution of time from infection to treatment**

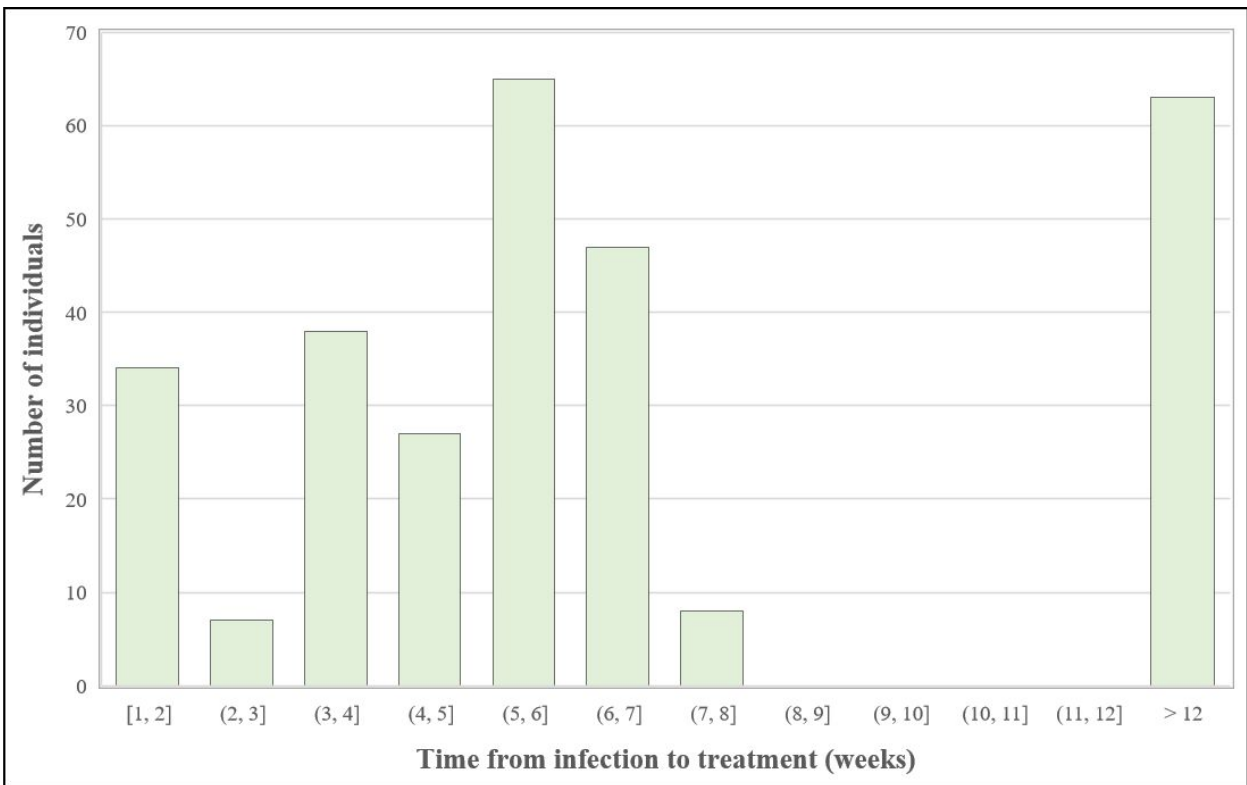

## Estimating Population Health Burden of Lyme disease in Ontario, Canada: A Microsimulation Modeling Approach

**Appendix 7. Health outcomes for scenario F (1 million people with 1-year risk of LD infection)**

| <b>Outcomes</b>                           | <b>Incidence per 100,000, n (%)</b> |
|-------------------------------------------|-------------------------------------|
| <b>Total LD infections</b>                | 53                                  |
| <b><i>Diagnosed cases</i></b>             | 47 (0.89)                           |
| Early localized                           | 21 (0.4)                            |
| Clinically diagnosed                      | 7 (0.33)                            |
| Lab-confirmed                             | 14 (0.67)                           |
| Early disseminated                        | 20 (0.38)                           |
| Late disseminated                         | 6 (0.11)                            |
| <b><i>Undiagnosed cases</i></b>           | 6 (0.11)                            |
| <b><i>Re-infections</i></b>               | 0 (0)                               |
| <b>Sequelae</b>                           |                                     |
| Arthritic                                 | 4 (0.09)                            |
| Cardiac                                   | 0 (0)                               |
| Cognitive                                 | 0 (0)                               |
| Cranial nerve palsy                       | 0 (0)                               |
| Multiple erythema migrans                 | 2 (0.04)                            |
| Neurological (meningitis, polyneuropathy) | 2 (0.04)                            |
| PTLDS                                     | 4 (0.09)                            |
| <b>QALYS</b>                              |                                     |
| Discounted (1.5%)                         | 19.38                               |

LD, Lyme disease; LY, Life years; PTLDS, post-treatment Lyme disease syndrome; QALY, quality-adjusted life years
